# Supplementary material for: An unusual tRNAThr derived from tRNAHis reassigns in yeast mitochondria the CUN codons to threonine
Source: PubMed Central journal article supplement — Nucleic Acids Res. 2011 Feb 14;39(11):4866–74. doi: 10.1093/nar/gkr073 (PMC3113583; doi:10.1093/nar/gkr073), 2011-02-14
Supplement: supp_gkr073_tRNAThr-Supplementary-revision.pdf [file supp_gkr073_tRNAThr-Supplementary-revision.pdf]

**An unusual tRNA<sup>Thr</sup> derived from tRNA<sup>His</sup> reassigns in yeast mitochondria  
the CUN codons to threonine**

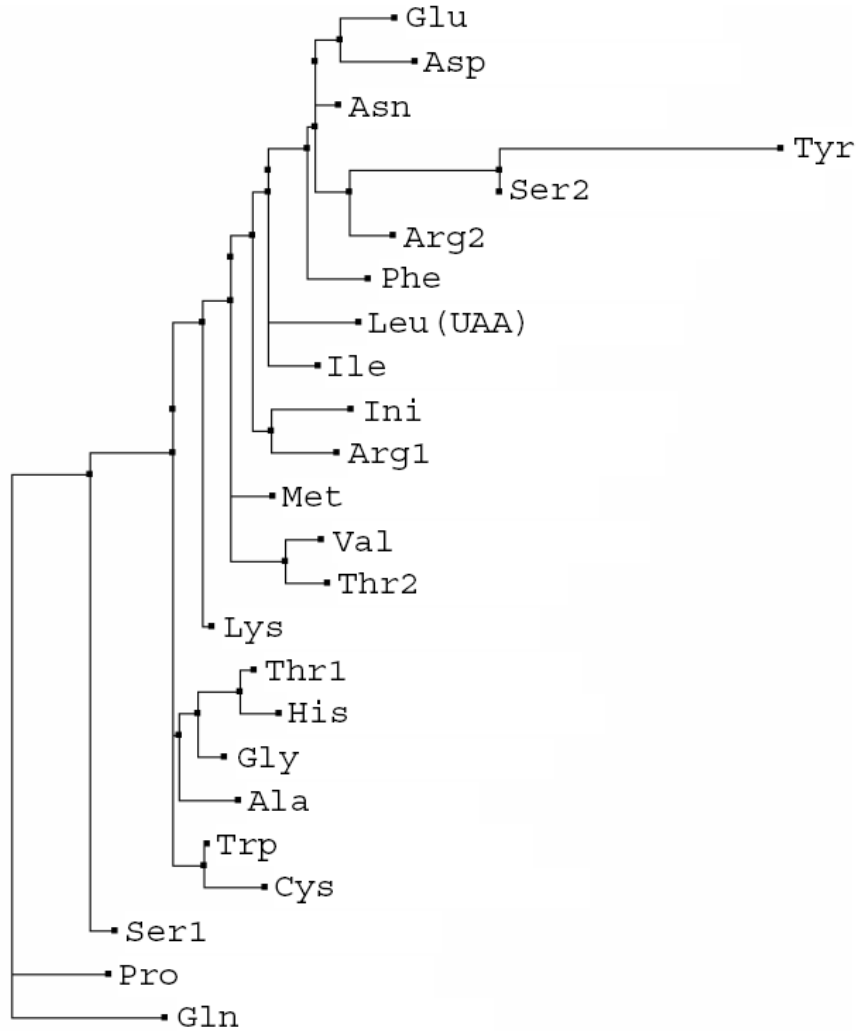

**Figure S1. Phylogeny of *S. cerevisiae* mitochondrial tRNAs.** *S. cerevisiae* mitochondria lack tRNA<sup>Leu</sup> with a UAG anticodon, but contain tRNA<sup>Thr1</sup>. Phylogenetic analysis shows that tRNA<sup>Thr1</sup> is closely related to tRNA<sup>His</sup>, but is distant from tRNA<sup>Thr2</sup>.
